# Supplementary material for: Comparative techno-economic analysis of different PV-assisted direct solar hydrogen generation systems
Source: Royal Society of Chemistry journal article supplement (doi:10.1039/d3ee01697h), 2023-01-01
Supplement: d3ee01697h1.pdf [file d3ee01697h1.pdf]

## Comparative Techno-economic Analysis of Different Direct Solar Hydrogen Generation Systems

*Astha Sharma<sup>1\*</sup>, Thomas Longden<sup>2</sup>, Kylie Catchpole<sup>1</sup>, and Fiona J. Beck<sup>1</sup>*

*1.School of Engineering, The Australian National University*

*2.Crawford School of Public Policy, The Australian National University*

*\*Corresponding author: [fiona.beck@anu.edu.au](mailto:fiona.beck@anu.edu.au)*

### SUPPLEMENTARY INFORMATION

#### Baseline costs

**Table S1: baseline costs for different DSHG configurations**

| Component                                                                                        | Coupled PEC                                                                      | Coupled PV-EC                                                                    | Decoupled PV-EC                                                                  | Ref    |
|--------------------------------------------------------------------------------------------------|----------------------------------------------------------------------------------|----------------------------------------------------------------------------------|----------------------------------------------------------------------------------|--------|
| <b>DSHG module</b>                                                                               |                                                                                  |                                                                                  |                                                                                  |        |
| PV module                                                                                        | 238.5 \$/kW                                                                      | 238.5 \$/kW                                                                      | 238.5 \$/kW                                                                      | [1]    |
| Membrane                                                                                         | 50 \$/m <sup>2</sup>                                                             | 50 \$/m <sup>2</sup>                                                             | 50 \$/m <sup>2</sup>                                                             | [2]    |
| Catalyst                                                                                         | 5.5 \$/m <sup>2</sup>                                                            | 5.5 \$/m <sup>2</sup>                                                            | 5.5 \$/m <sup>2</sup>                                                            | [3]    |
| Chassis and module assembling cost                                                               | 140 \$/kW                                                                        | 140 \$/kW                                                                        | 140 \$/kW                                                                        | [4]    |
| DC-DC convertor                                                                                  |                                                                                  |                                                                                  | 100 \$/unit                                                                      |        |
|                                                                                                  |                                                                                  |                                                                                  |                                                                                  |        |
| <b>Hard BoS</b>                                                                                  |                                                                                  |                                                                                  |                                                                                  |        |
| Racking/mounting structure                                                                       | 64 \$/kW                                                                         | 64 \$/kW                                                                         | 64 \$/kW                                                                         | [1]    |
| Piping                                                                                           | P5 – 4 \$/m<br>P4 – 4 \$/m<br>P3 – 6.18 \$/m<br>P2 – 6.18 \$/m<br>P1 – 8.51 \$/m | P5 – 4 \$/m<br>P4 – 4 \$/m<br>P3 – 6.18 \$/m<br>P2 – 6.18 \$/m<br>P1 – 8.51 \$/m | P5 – 4 \$/m<br>P4 – 4 \$/m<br>P3 – 6.18 \$/m<br>P2 – 6.18 \$/m<br>P1 – 8.51 \$/m | [5, 6] |
| Gas compressor and condenser with intercoolers                                                   | 220 \$/kW                                                                        | 220 \$/kW                                                                        | 220 \$/kW                                                                        | [7]    |
| Water circulation                                                                                | 169 \$/kW                                                                        | 169 \$/kW                                                                        | 169 \$/kW                                                                        | [7]    |
| Controllers and sensors water level controller, pressure sensor, hydrogen sensor, gas flow meter | 525 \$/unit (collective for all 4 controllers and sensors)                       | 525 \$/unit (collective for all 4 controllers and sensors)                       | 525 \$/unit (collective for all 4 controllers and sensors)                       | [6]    |
| Wiring- signal, power and conduit                                                                | 0.8 \$/ft                                                                        | 0.8 \$/ft                                                                        | 0.8 \$/ft                                                                        | [6]    |
|                                                                                                  |                                                                                  |                                                                                  |                                                                                  |        |
| <b>Installation</b>                                                                              |                                                                                  |                                                                                  |                                                                                  |        |
| Mechanical installation and inspection                                                           | 59 \$/kW                                                                         | 59 \$/kW                                                                         | 59 \$/kW                                                                         | [1]    |
| Piping installation                                                                              | 29.6 \$/kW                                                                       | 29.6 \$/kW                                                                       | 29.6 \$/kW                                                                       |        |
| Electrical installation                                                                          | 11.84 \$/kW                                                                      | 11.84 \$/kW                                                                      | 11.84 \$/kW                                                                      |        |
|                                                                                                  |                                                                                  |                                                                                  |                                                                                  |        |
| <b>Soft BoS</b>                                                                                  |                                                                                  |                                                                                  |                                                                                  |        |

|                                           |                                                                                         |                                     |                                     |     |
|-------------------------------------------|-----------------------------------------------------------------------------------------|-------------------------------------|-------------------------------------|-----|
| Margin                                    | 60.7 \$/kW                                                                              | 60.7 \$/kW                          | 60.7 \$/kW                          | [1] |
| Financing costs                           | 32.6 \$/kW                                                                              | 32.6 \$/kW                          | 32.6 \$/kW                          | [1] |
| System design                             | 9.1 \$/kW                                                                               | 9.1 \$/kW                           | 9.1 \$/kW                           | [1] |
| Permitting                                | 14.08 \$/kW                                                                             | 14.08 \$/kW                         | 14.08 \$/kW                         | [1] |
| Incentive applications                    | 8.94 \$/kW                                                                              | 8.94 \$/kW                          | 8.94 \$/kW                          | [1] |
| Customer acquisition                      | 9.13 \$/kW                                                                              | 9.13 \$/kW                          | 9.13 \$/kW                          | [1] |
|                                           |                                                                                         |                                     |                                     |     |
| <b>Replacement costs</b>                  |                                                                                         |                                     |                                     |     |
| Replacement catalyst cost                 | Catalyst cost for future year with 2.5% cost reduction per year and 1.9% inflation rate |                                     |                                     |     |
| Replacement membrane cost                 | Membrane cost for future year with 2.5% cost reduction per year and 1.9% inflation rate |                                     |                                     |     |
| Replacement of DSHG module cost           | cost for future year with 2.5% cost reduction per year and 1.9% inflation rate          |                                     |                                     |     |
| Replacement components installation costs | 50% of mechanical installation cost                                                     | 50% of mechanical installation cost | 50% of mechanical installation cost | [1] |
| DSHG O&M costs*                           | 10 \$/kW/yr                                                                             | 10 \$/kW/yr                         | 10 \$/kW/yr                         | [1] |
| pipng O&M costs*                          | 10 \$/kW/yr                                                                             | 10 \$/kW/yr                         | 10 \$/kW/yr                         |     |
| Water costs*                              | 3.9 \$/kGal/yr                                                                          |                                     |                                     | [8] |

\*An inflation rate of 1.9% per year is considered while calculating these costs

\*\*Cost reduction of 2.5% per year for future assuming production will scaleup exponentially

**Table S2: baseline costs for PV-E configuration**

| Component                           | cost        | ref |
|-------------------------------------|-------------|-----|
| <b>PV system</b>                    |             |     |
| <b>Module and inverter hardware</b> |             |     |
| PV module                           | 238.5 \$/kW | [1] |
| Inverter                            | 33.43 \$/kW | [1] |
|                                     |             |     |
| <b>BoS hardware</b>                 |             |     |
| Racking and mounting                | 43.30 \$/kW | [1] |
| Cabling/wiring                      | 30.57 \$/kW | [1] |
| Safety and security                 | 17.47 \$/kW | [1] |
| Monitoring and control              | 3.20 \$/kW  | [1] |
|                                     |             |     |
| <b>Installation</b>                 |             |     |
| Mechanical installation             | 50.28 \$/kW | [1] |
| Electrical installation             | 36.1 \$/kW  | [1] |
| Inspection                          | 8.93 \$/kW  | [1] |
|                                     |             |     |
| <b>Soft BoS</b>                     |             |     |
| Margin                              | 60.7 \$/kW  | [1] |
| Financing costs                     | 32.6 \$/kW  | [1] |
| System design                       | 9.1 \$/kW   | [1] |
| Permitting                          | 14.08 \$/kW | [1] |
| Incentive applications              | 8.94 \$/kW  | [1] |
| Customer acquisition                | 9.13 \$/kW  | [1] |
|                                     |             |     |

|                                        |                                                                                           |         |
|----------------------------------------|-------------------------------------------------------------------------------------------|---------|
| <b>Electrolyzer system</b>             |                                                                                           |         |
| <b>PEM stack</b>                       |                                                                                           |         |
| Porous transport layer (PTL)           | 61.2 \$/kW                                                                                | [9] [7] |
| Small parts (sealing, frames)          | 10.8 \$/kW                                                                                | [9] [7] |
| Bipolar plates                         | 190.8 \$/kW                                                                               | [9] [7] |
| Stack assembly and end plates          | 10.8 \$/kW                                                                                | [9] [7] |
| Catalyst coated membranes              |                                                                                           | [9] [7] |
| Manufacturing                          | 36 \$/kW                                                                                  |         |
| PFSA membrane                          | 17.6 \$/kW                                                                                |         |
| Iridium                                | 21.6 \$/kW                                                                                |         |
| Platinum                               | 11.2 \$/kW                                                                                |         |
|                                        |                                                                                           |         |
| <b>Hard BoS</b>                        |                                                                                           |         |
| Power supply                           | 220 \$/kW                                                                                 | [9] [7] |
| Deionized water circulation            | 96.8 \$/kW                                                                                | [9] [7] |
| Hydrogen processing                    | 88 \$/kW                                                                                  | [9] [7] |
| Cooling                                | 35.2 \$/kW                                                                                | [9] [7] |
|                                        |                                                                                           |         |
| <b>O&amp;M</b>                         |                                                                                           |         |
| For PV*                                | 10 \$/kW/yr                                                                               | [1]     |
| For electrolyzer*                      | 3% of electrolyzer capital cost                                                           | [10]    |
| Water*                                 | 3.9 \$/KGal/yr                                                                            | [8]     |
|                                        |                                                                                           |         |
| <b>Replacement cost</b>                |                                                                                           |         |
| Catalyst                               | Catalyst cost for future year with 2.5% cost reduction per year** and 1.9% inflation rate |         |
| Replacement material installation cost |                                                                                           |         |
|                                        |                                                                                           |         |

\*An inflation rate of 1.9% per year is considered while calculating these costs

\*\*Cost reduction of 2.5% per year for future assuming production will scaleup exponentially

**Table S3: cost range for DSHG configurations. All the costs are color coded in red, yellow and green based on the level of uncertainty in the costs, where green are least uncertain, and red are the most.**

| Variable                       | Baseline    | Min         | Max          | Range |
|--------------------------------|-------------|-------------|--------------|-------|
| Capacity factor                | 20          | 22          | 20           |       |
| Discount rate                  | 8           | 5           | 8            |       |
| <b>DSHG Module</b>             |             |             |              |       |
| PV module                      | 238.5 \$/kW | 238.5 \$/kW | 263.65 \$/kW | [1]   |
| Catalyst cost                  | 5.5 \$/m2   | 0 \$/m2     | 8 \$/m2      | [3]   |
| DC-DC convertor                | 100 \$/unit | 0 \$/m2     |              |       |
| Membrane cost                  | 50 \$/m2    | 30 \$/m2    | 180 \$/m2    | [2]   |
| Membrane and catalyst lifetime | 5 years     | 5           | 5            |       |
| <b>Hard BoS</b>                |             |             |              |       |

|                                                      |           |           |                   |                                                  |
|------------------------------------------------------|-----------|-----------|-------------------|--------------------------------------------------|
| Racking and mounting                                 | 64 \$/kW  | 64 \$/kW  | 111.25 \$/kW      | Min- current value, Max- mid PV range values [1] |
| Electrolyte and Gas handling (compressors and pumps) | 220 \$/kW | 165 \$/Kw | 495 \$/kW         | IEA [11] and NREL [7]                            |
| Piping material                                      | 30 \$/kW  | 30        | 45                | Min plastic, max steel                           |
| Controllers and sensors                              | 20 \$/kW  | 0         | <b>1200 \$/kW</b> | 500% increase in cost                            |
| <b>Installation and other soft BoS</b>               |           |           |                   |                                                  |
| Mechanical and electrical installation               | 71 \$/kW  | 71 \$/kW  | 120 \$/kW         | Min- current value, Max- mid PV range values [1] |
| Other soft BoS                                       | 135 \$/kW | 135 \$/kW | 183 \$/kW         | Min- current value, Max- mid PV range values [1] |
| Piping installation                                  | 30\$/kW   | 30        | 60                | Piping installation cost ~ total material cost   |
| <b>O&amp;M</b>                                       |           |           |                   |                                                  |
| DSHG                                                 | 10 \$/kW  | 10        | 18                | [1]                                              |
| piping                                               | 10 \$/kW  | 5         | 18                | [1]                                              |
| <b>Replacement</b>                                   |           |           |                   |                                                  |
| Replacement materials installation costs             | 30 \$/kW  | 15        | 45                | ± 50%                                            |

**Table S4: cost range for PV-E configurations**

| Component                                                     | baseline | min | max  |                                                  |
|---------------------------------------------------------------|----------|-----|------|--------------------------------------------------|
| PV system (\$/kW)                                             | 596      | 596 | 952  | Min- current value, Max- mid PV range values [1] |
| Electrolyzer (\$/kW)                                          | 800      | 560 | 1800 | IEA [11] and NREL [7]                            |
| PV O&M cost (\$/kW/yr)                                        | 10       | 10  | 18   | [1]                                              |
| Piping O&M cost (\$/kW/yr)                                    | 10       | 5   | 18   | [1]                                              |
| Replacement materials installation costs (% of original cost) | 30       | 15  | 45   | ± 50%                                            |

### Module specifications

The performance and size parameters of commercially available LG R series Si PV module – LG435QAC, are used in the current work. The specifications of the module are given in detail in the below tables.

**Table S5: Dimensions and layout of Si PV module**

|              |       |      |
|--------------|-------|------|
| No of cells  | 66    |      |
| module width | 40.94 | inch |

|               |        |                 |
|---------------|--------|-----------------|
|               | 104    | cm              |
| module length | 75.2   | inch            |
|               | 191    | cm              |
| Area          | 19864  | cm <sup>2</sup> |
| Cell area     | 300.97 | cm <sup>2</sup> |
| Coverage      | 86.8   | %               |

**Table S6: Dimensions and layout of DSTH module**

|             |        |                 |
|-------------|--------|-----------------|
| No of cells | 66     |                 |
| Length      | 191    | cm              |
| Width       | 104    | cm              |
| Area        | 19864  | cm <sup>2</sup> |
| Depth       | 0.1    | cm              |
| Volume      | 1986.4 | cm <sup>3</sup> |
| Volume      | 1.9864 | L               |

**Table S7: Operating parameters of the PV and DSTH module**

| Parameter                                               |                  | value | unit   |
|---------------------------------------------------------|------------------|-------|--------|
| Output power                                            | P <sub>max</sub> | 435   | Watt   |
| Voltage at maximum power point                          | V <sub>mpp</sub> | 41.1  | Volts  |
| Current at maximum power point                          | I <sub>mpp</sub> | 10.6  | Ampere |
| Open circuit voltage                                    | V <sub>oc</sub>  | 48    | Volts  |
| Short circuit current                                   | I <sub>sc</sub>  | 11.2  | Ampere |
| Fill factor                                             | FF               | 80.9  | %      |
| PV module efficiency                                    | η                | 21.9  | %      |
| STH efficiency for coupled configuration (calculated)   | STH              | 15.26 | %      |
| STH efficiency for decoupled configuration (calculated) | STH              | 20.60 | %      |

### Hydrogen production rates

The hydrogen production rates for the given module design and STH efficiency are calculated using the operating current density. The hydrogen production rate is then extended to the module and plant level.

$$\text{Rate of hydrogen production per area (gm/s/cm}^2\text{)} = \frac{J_{op} \text{ (A/cm}^2\text{)} \times 1.23 \text{ (V)}}{\text{calorific value of hydrogen (J/gm)}}$$

Rate of hydrogen production per cell = size of cell (cm<sup>2</sup>) x rate of hydrogen production per area

Rate of hydrogen production per module = cells per module x rate of hydrogen production per cell

## Component costs from utility scale PV plants

Different costs: are taken from utility scale PV plants. We took the detailed cost values for different countries from IRENA power generation report 2021 [1] and used standard deviation to define the low, mid, and high-cost ranges. Figure S1(a) shows the total cost of different components of interest for different countries in \$/kW directly taken from the IRENA power generation report.

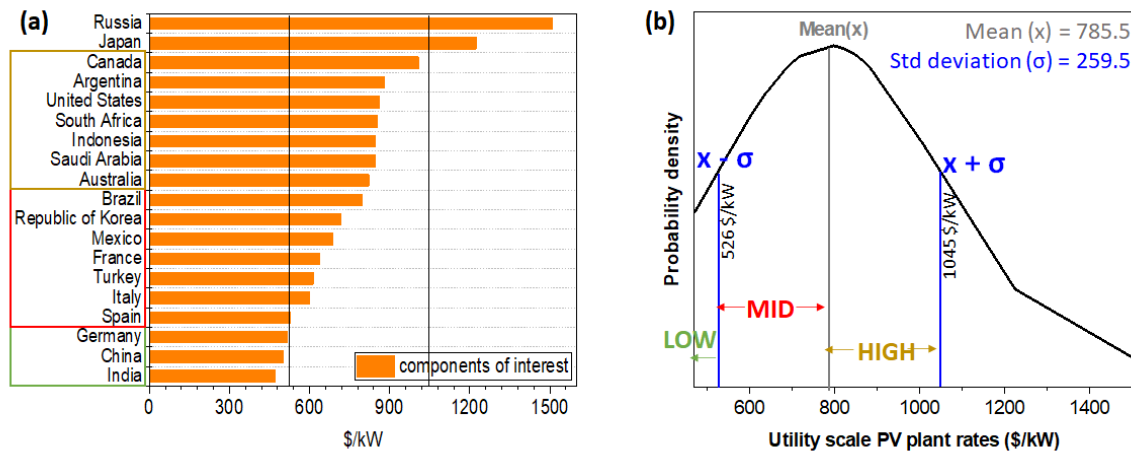

**Figure S1:** (a) Utility scale PV costs for different countries from IRENA report (b) standard deviation curve and low, mid, and high ranges

Figure S1(b) shows the standard deviation curve for utility scale PV costs of interest for different countries. The low and mid-range for the utility-scale PV plant is set by taking one and two standard deviations of values lower than mean respectively, while the high range is defined by taking one standard deviation of values higher than mean, assuming that no renewable hydrogen plants would be built in the most expensive places.

## Sensitivity analysis

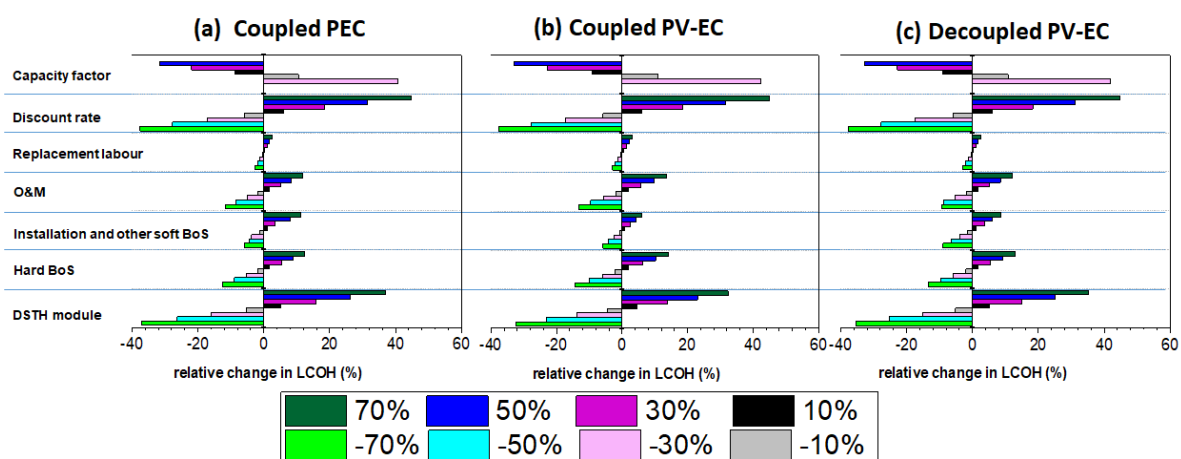

**Figure S2:** Sensitivity analysis for the DSHG systems based on the costs of PV panel, membrane, PEC panel, Hard BoS, soft BoS, Discount rate and capacity factor. Each analysis represents the relative change in LCOH values (x-axis) from the base value (as shown in figure 3(a), for low PV cost) on varying a single parameter.

## Regression analysis

Table S8 shows list of the list of components, associated regression coefficients  $\beta_x$ , standard error ( $SE_x$ ) and t-values ( $t_x$ ) for all the three DSHG systems. Regression estimates are used to estimate the impacts of individual (or combinations) of variables, while holding all other factors constant. For a linear regression like this, the coefficients are the marginal change in the LCOH for changes in that factor. All the costs are color coded in red, yellow and green based on the level of uncertainty in the costs, where green are least uncertain, and red are the most. The significance of individual parameters in each configuration is quantified using t-statistics ' $t_x$ ', calculated using equation 3. A higher t-statistics value signifies higher dependence of the LCOH on the cost estimate associated with that parameter.

Table S8: Regression coefficient and t-values for different components for three different DSHG configurations.

| term                  | Coupled PEC |            |         |          |     | Coupled PV-EC |            |         |          |     | Decoupled PV-EC |            |         |          |     |
|-----------------------|-------------|------------|---------|----------|-----|---------------|------------|---------|----------|-----|-----------------|------------|---------|----------|-----|
|                       | estimate    | Std. Error | t value | Pr(> t ) |     | estimate      | Std. Error | t value | Pr(> t ) |     | estimate        | Std. Error | t value | Pr(> t ) |     |
| Panel                 | 0.01004     | 0.000347   | 28.98   | < 2e-16  | *** | 0.0037250     | 0.0002052  | 18.15   | < 2e-16  | *** | 0.002563        | 0.000272   | 9.417   | 2.5E-16  | *** |
| Membrane              | 0.00948     | 0.000111   | 85.66   | < 2e-16  | *** | 0.0095080     | 0.0000745  | 127.7   | < 2e-16  | *** | 0.006941        | 9.25E-05   | 75.04   | < 2e-16  | *** |
| Catalyst              | 0.0095      | 0.000993   | 9.57    | < 2e-16  | *** | 0.0103900     | 0.0008822  | 11.77   | < 2e-16  | *** | 0.006607        | 0.000838   | 7.882   | 1.2E-12  | *** |
| lifetime              | 0.00691     | 0.000285   | 24.28   | < 2e-16  | *** | 0.0042360     | 0.0001922  | 22.04   | < 2e-16  | *** | 0.003142        | 0.000234   | 13.42   | < 2e-16  | *** |
| chassis               | 0.00371     | 0.000402   | 9.231   | 8.6E-16  | *** | 0.0037600     | 0.0002693  | 13.96   | < 2e-16  | *** | 0.002313        | 0.000354   | 6.525   | 1.4E-09  | *** |
| DC-DC<br>converter    |             |            |         |          |     |               |            |         |          |     | 0.000588        | 0.000547   | 1.077   | 0.28361  |     |
| racking               | 0.00413     | 0.000814   | 5.072   | 1.38E-06 | *** | 0.0042240     | 0.0005460  | 7.736   | 3.07E-12 | *** | 0.002479        | 0.000313   | 7.925   | 9.7E-13  | *** |
| pipng<br>material     | 0.00325     | 0.000453   | 7.176   | 5.6E-11  | *** | 0.0032430     | 0.0003019  | 10.74   | < 2e-16  | *** | 0.002226        | 0.000278   | 7.994   | 6.7E-13  | *** |
| handling              | 0.00352     | 0.000256   | 13.73   | < 2e-16  | *** | 0.0035600     | 0.0001712  | 20.8    | < 2e-16  | *** | 0.002291        | 0.000227   | 10.08   | < 2e-16  | *** |
| water                 | 0.00279     | 0.001067   | 2.614   | 0.01004  | *   | 0.0029190     | 0.0007186  | 4.062   | 8.5E-05  | *** | 0.001982        | 0.000885   | 2.239   | 0.0269   | *   |
| sensors               | 0.00342     | 0.000894   | 3.826   | 0.00021  | *** | 0.0035940     | 0.0006024  | 5.966   | 2.3E-08  | *** | 0.002065        | 0.000752   | 2.744   | 0.00694  | **  |
| installation          | 0.00363     | 0.000568   | 6.399   | 2.8E-09  | *** | 0.0037480     | 0.0003819  | 9.814   | < 2e-16  | *** | 0.00229         | 0.000483   | 4.737   | 5.7E-06  | *** |
| soft BoS              | 0.00341     | 0.000277   | 12.29   | < 2e-16  | *** | 0.0034350     | 0.0001863  | 18.43   | < 2e-16  | *** | 0.002312        | 0.000235   | 9.84    | < 2e-16  | *** |
| pipng<br>installation | 0.00338     | 0.0003     | 9.994   | < 2e-16  | *** | 0.0033810     | 0.0003383  | 9.994   | < 2e-16  | *** | 0.002266        | 0.000415   | 5.458   | 2.4E-07  | *** |
| pipng OnM             | 0.00331     | 0.000156   | 21.15   | < 2e-16  | *** | 0.0033280     | 0.0001051  | 31.67   | < 2e-16  | *** | 0.004689        | 0.000133   | 35.35   | < 2e-16  | *** |
| rest OnM              | 0.00331     | 0.000156   | 21.15   | < 2e-16  | *** | 0.0033280     | 0.0001051  | 31.67   | < 2e-16  | *** | 0.004247        | 0.000125   | 33.93   | < 2e-16  | *** |
| replacement           | 0.01122     | 0.000502   | 22.37   | < 2e-16  | *** | 0.0112600     | 0.0003383  | 33.27   | < 2e-16  | *** | 0.004536        | 0.000428   | 10.61   | < 2e-16  | *** |



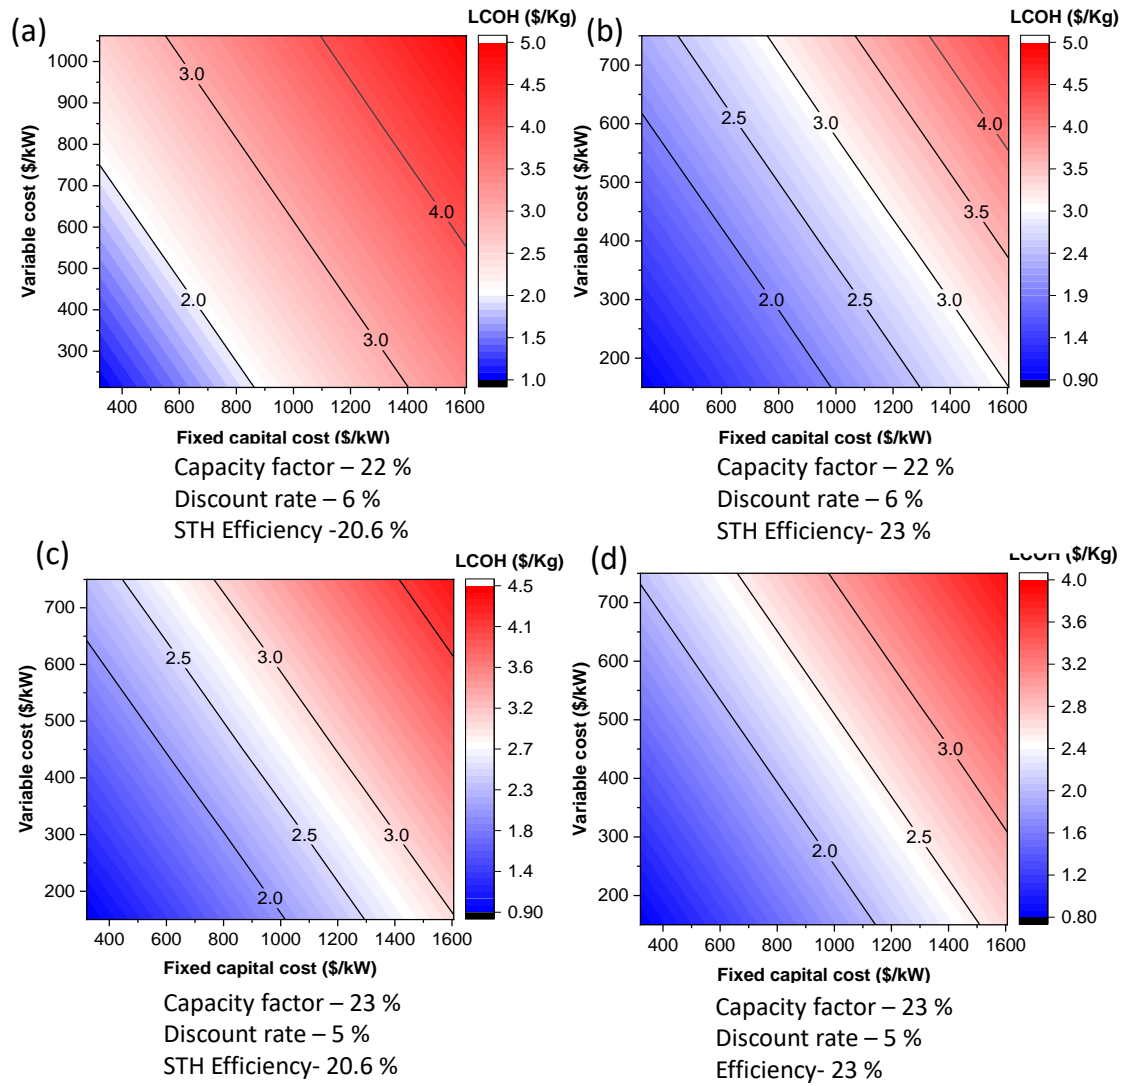

Figure S3: LCOH surface plot for different STH efficiency, capacity factor and discount rates

## References:

1. IRENA, *Renewable power generation costs*. 2020.
2. Brian D. James, J.M.H.-K., Cassidy Houchins, Daniel A. DeSantis, *Mass Production Cost Estimation of Direct H<sub>2</sub> PEM Fuel Cell Systems for Transportation Applications: 2018 Update*. NREL, 2018.
3. Shaner, M.R., et al., *A comparative techno-economic analysis of renewable hydrogen production using solar energy*. *Energy and Environmental Science* 2016. **9**(7): p. 2354-2371.
4. Chang, N.L., et al., *A bottom-up cost analysis of silicon–perovskite tandem photovoltaics*. *Progress in Photovoltaics: Research and Applications*, 2021. **29**(3): p. 401-413.
5. Sathre, R., et al., *Life-cycle net energy assessment of large-scale hydrogen production via photoelectrochemical water splitting*. 2014. **7**(10): p. 3264-3278.
6. James, B.D., et al., *Technoeconomic analysis of photoelectrochemical (PEC) hydrogen production*. DOE report, 2009.
7. Mayyas, A.T., et al., *Manufacturing cost analysis for proton exchange membrane water electrolyzers*. 2019, National Renewable Energy Lab.(NREL), Golden, CO (United States).
8. *Water and Wastewater Annual Price Escalation Rates for Selected Cities across the United States*. Federal energy management program, NREL, 2017.
9. IRENA, G.H.C.R., *Scaling up Electrolysers to Meet the 1.5 °C Climate Goal*. International Renewable Energy Agency, Abu Dhabi, 2020.
10. NREL, *H<sub>2</sub>A: Hydrogen Analysis Production Model*. 2018.
11. (IEA), I.E.A., *Global Hydrogen Review 2021*.
